# Supplementary material for: Evaluation of the Success of High-Throughput Physiologically Based Pharmacokinetic (HT-PBPK) Modeling Predictions to Inform Early Drug Discovery
Source: PubMed Central journal article supplement (PMC9257750; doi:10.1021/acs.molpharmaceut.2c00040), 2022-04-27
Supplement: mp2c00040_si_001.pdf [file mp2c00040_si_001.pdf]

**Supplementary information for:**

**Evaluation of the success of high throughput physiologically-based pharmacokinetic (HT-PBPK) modeling predictions to inform early drug discovery**

Doha Naga<sup>1, 2, §</sup>, Neil Parrott<sup>1</sup>, Gerhard F. Ecker<sup>2</sup> and Andrés Olivares-Morales<sup>1, §, \*</sup>

<sup>1</sup>Roche Pharma Research and Early Development (pRED), Roche Innovation Center Basel, 4070 Basel, Switzerland.

<sup>2</sup>Department of Pharmaceutical Sciences, University of Vienna, 1090 Vienna, Austria.

<sup>§</sup>Both authors contributed equally to this work

<sup>\*</sup>To whom correspondence should be addressed

**\*Corresponding Author**

Dr. Andrés Olivares-Morales

Roche Pharma Research and Early Development (pRED), Grenzacherstrasse 124, 4070 Basel Switzerland

Phone +41 61 688 0798

Email: andres.olivares@roche.com

**Figure S1.** Scatter plots showing  $AUC_{inf}$  predictions for the six different scaling methods (IV route)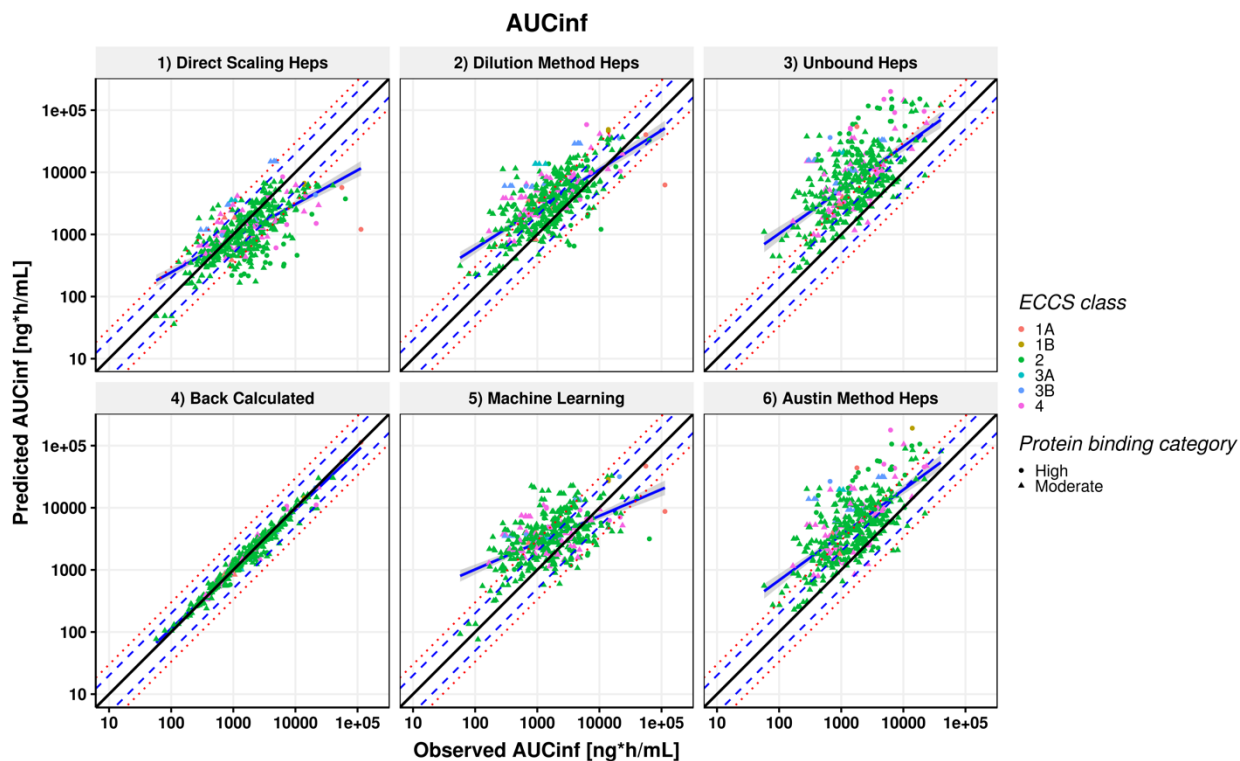

Observed PK parameters are plotted on the x axis while predicted parameters are on the y axis. Solid black line represent the line of unity; blue dashed-line and red dotted lines represents the 2 and 3 fold error, respectively; blue solid line and shaded grey area represents a linear regression and its 95% confidence interval. The high and moderate protein binding category compounds are represented by circles and triangles respectively.

**Figure S2.** Scatter plots showing  $C_{\max}$  predictions for the six different scaling methods (PO)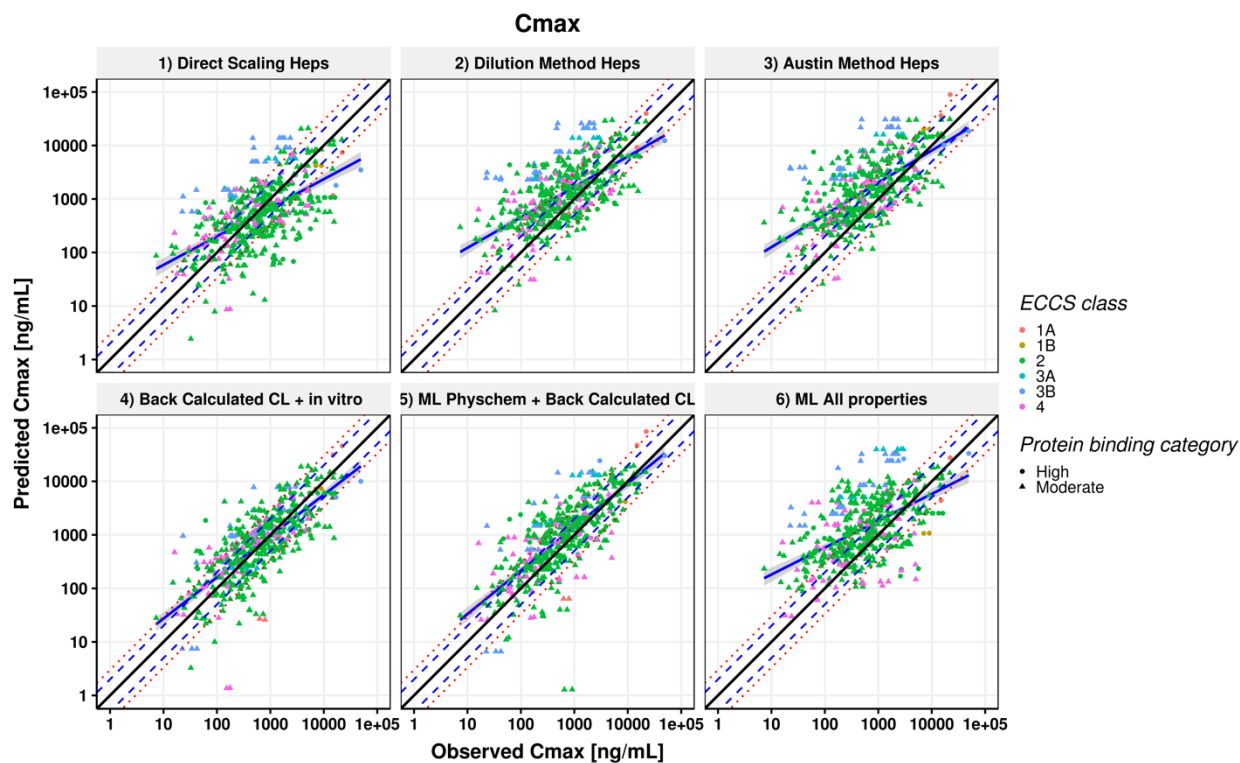

Observed PK parameters are plotted on the x axis while predicted parameters are on the y axis. Solid black line represent the line of unity; blue dashed-line and red dotted lines represents the 2 and 3 fold error, respectively; blue solid line and shaded grey area represents a linear regression and its 95% confidence interval. The high and moderate protein binding category compounds are represented by circles and triangles respectively.

**Figure S3.** A comparison between the measured (x-axis) and predicted values (y-axis) of the physico chemical properties for the compounds.

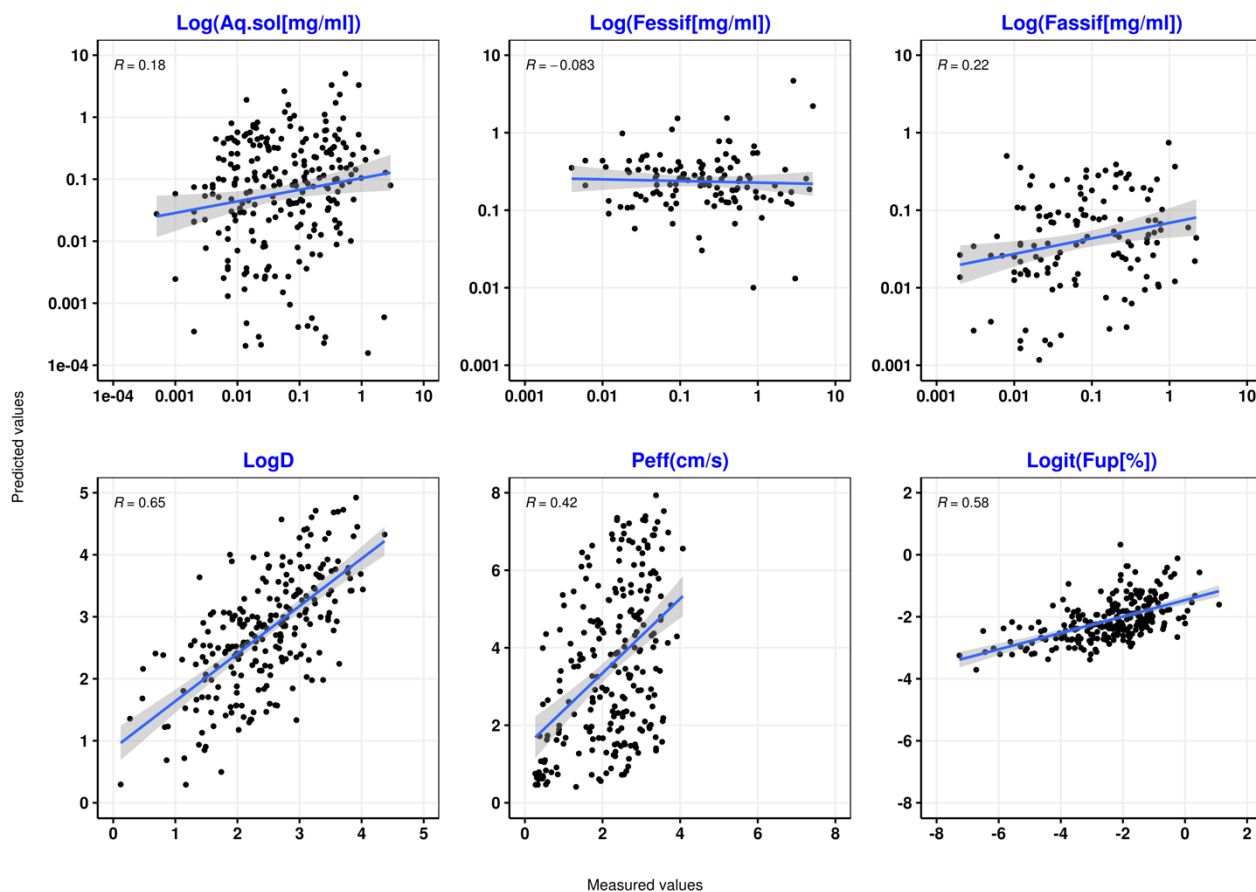

Spearman correlation coefficients are indicated on each plot. Blue lines represent the regression lines. Logit transformation\* is applied to the Fup(%). Logit transformation was applied according to the equation :  $logit(x) = \frac{x}{100}, \log\left(\frac{x}{1-x}\right)$

**Figure S4** Scatter plot illustrating dose normalized  $AUC_{0-\infty}$  predictions for oral formulations.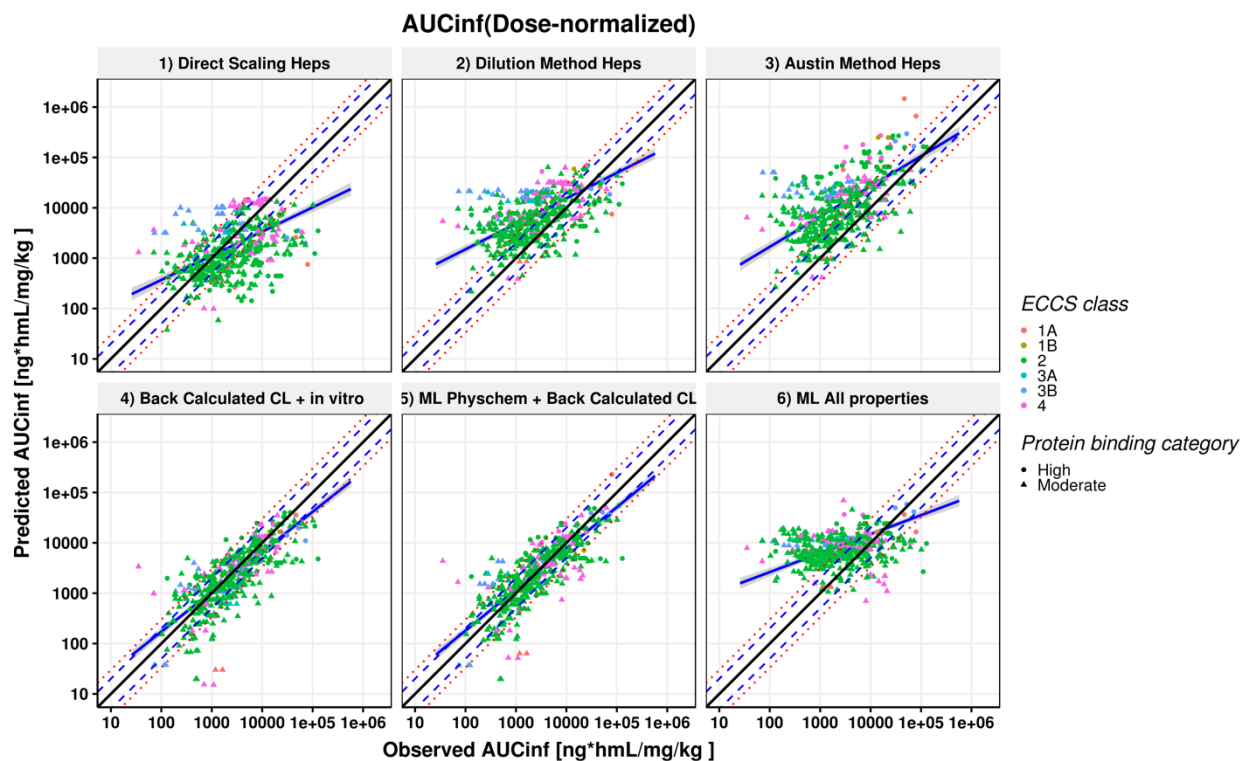

Observed PK parameters are plotted on the x axis while predicted parameters are on the y axis. Solid black line represent the line of unity; blue dashed-line and red dotted lines represents the 2 and 3 fold error, respectively; blue solid line and shaded grey area represents a linear regression and its 95% confidence interval. The high and moderate protein binding category compounds are represented by circles and triangles respectively.

**Figure S5.** Scatter plot illustrating dose normalized  $C_{max}$  predictions for oral formulations.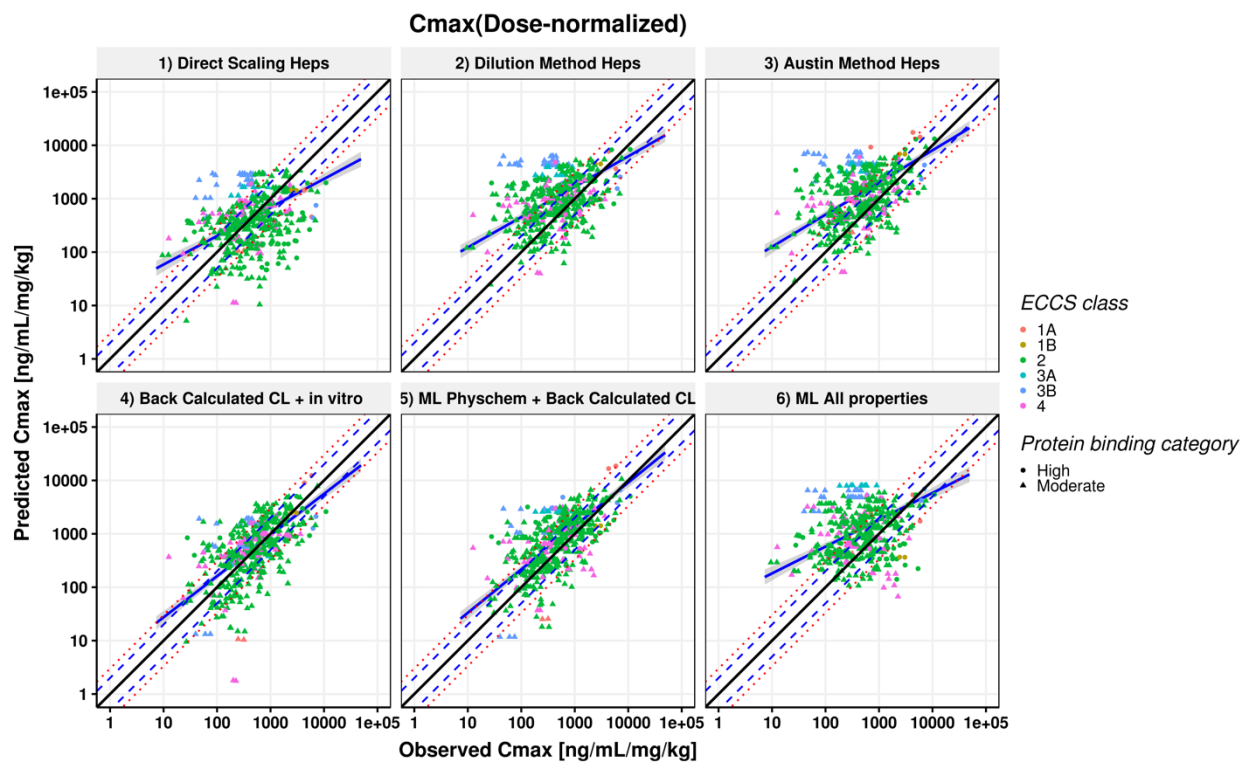

Observed PK parameters are plotted on the x axis while predicted parameters are on the y axis. Solid black line represent the line of unity; blue dashed-line and red dotted lines represents the 2 and 3 fold error, respectively; blue solid line and shaded grey area represents a linear regression and its 95% confidence interval. The high and moderate protein binding category compounds are represented by circles and triangles respectively.

**Figure S6.** Histogram of predicted fraction absorbed ( $F_{abs}$ ) in rats after PO administration using back-calculated  $C_{L_{int}}$  and measured vs machine learning predicted input parameters (aqueous solubility, intestinal permeability, LogD and  $f_{up}$ )

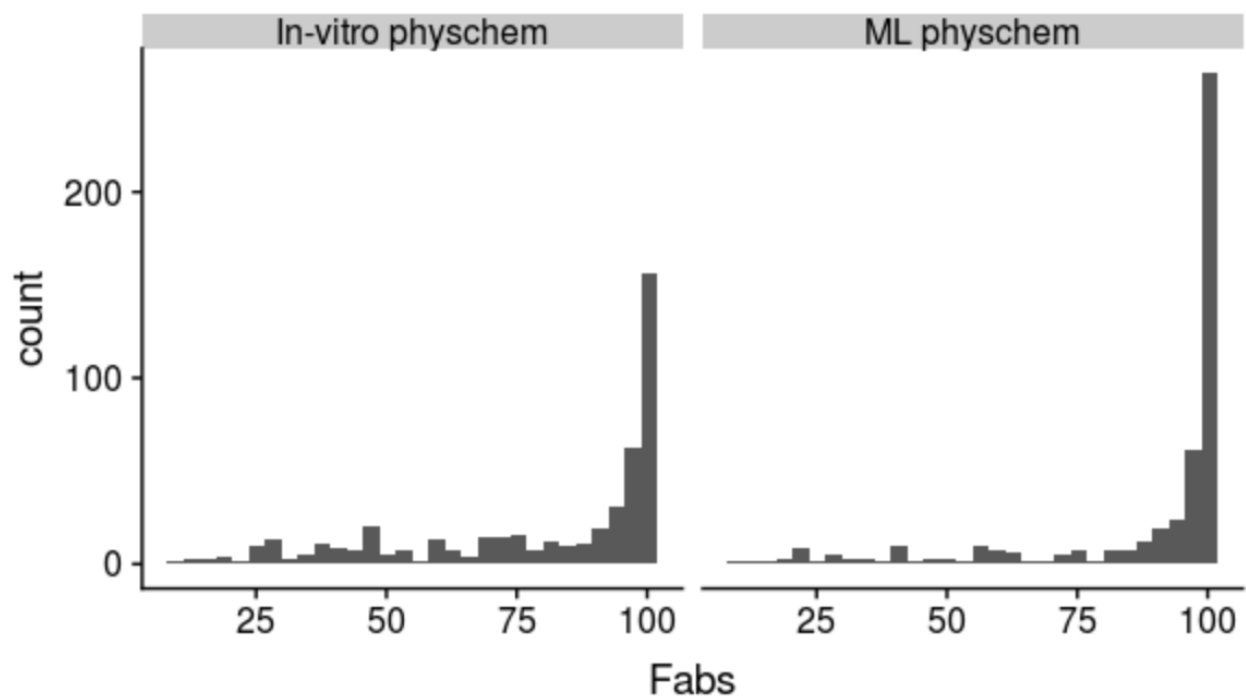

## Supplementary tables

Table S1. Ring scaffold system classes.

| Class ID                                                                                                                                         | Class Size                       |
|--------------------------------------------------------------------------------------------------------------------------------------------------|----------------------------------|
| Class identifier. ID values of non-singleton classes generally have the form "C 1", "C 2", etc., while singleton classes have "S 1", "S 2", etc. | Number of compounds in the class |
| C 1                                                                                                                                              | 23                               |
| C 2                                                                                                                                              | 21                               |
| C 3                                                                                                                                              | 19                               |
| C 4                                                                                                                                              | 16                               |
| C 5                                                                                                                                              | 14                               |
| C 6                                                                                                                                              | 14                               |
| C 7                                                                                                                                              | 14                               |
| C 8                                                                                                                                              | 11                               |
| C 9                                                                                                                                              | 10                               |
| C 10                                                                                                                                             | 9                                |
| C 11                                                                                                                                             | 8                                |
| C 12                                                                                                                                             | 7                                |
| C 13                                                                                                                                             | 7                                |
| C 14                                                                                                                                             | 7                                |
| C 15                                                                                                                                             | 6                                |
| C 16                                                                                                                                             | 6                                |
| C 17                                                                                                                                             | 6                                |
| C 18                                                                                                                                             | 6                                |
| C 19                                                                                                                                             | 5                                |
| C 20                                                                                                                                             | 5                                |
| C 21                                                                                                                                             | 5                                |
| C 22                                                                                                                                             | 5                                |
| C 23                                                                                                                                             | 5                                |
| C 24                                                                                                                                             | 4                                |
| C 25                                                                                                                                             | 4                                |
| C 26                                                                                                                                             | 4                                |
| C 27                                                                                                                                             | 4                                |
| C 28                                                                                                                                             | 4                                |
| C 29                                                                                                                                             | 4                                |
| C 30                                                                                                                                             | 4                                |
| C 31                                                                                                                                             | 4                                |
| C 32                                                                                                                                             | 4                                |
| C 33                                                                                                                                             | 4                                |
| C 34                                                                                                                                             | 4                                |
| C 35                                                                                                                                             | 4                                |
| C 36                                                                                                                                             | 3                                |
| C 37                                                                                                                                             | 3                                |
| C 38                                                                                                                                             | 3                                |
| C 39                                                                                                                                             | 3                                |
| C 40                                                                                                                                             | 3                                |
| C 41                                                                                                                                             | 3                                |



|      |   |
|------|---|
| C 42 | 3 |
| C 43 | 3 |
| C 44 | 3 |
| C 45 | 3 |
| C 46 | 3 |
| C 47 | 2 |
| C 48 | 2 |
| C 49 | 2 |
| C 50 | 2 |
| C 51 | 2 |
| C 52 | 2 |
| C 53 | 2 |
| C 54 | 2 |
| C 55 | 2 |
| C 56 | 2 |
| C 57 | 2 |
| S 1  | 1 |
| S 2  | 1 |
| S 3  | 1 |
| S 4  | 1 |
| S 5  | 1 |
| S 6  | 1 |
| S 7  | 1 |
| S 8  | 1 |
| S 9  | 1 |
| S 10 | 1 |
| S 11 | 1 |
| S 12 | 1 |
| S 13 | 1 |
| S 14 | 1 |
| S 15 | 1 |
| S 16 | 1 |
| S 17 | 1 |
| S 18 | 1 |
| S 19 | 1 |
| S 20 | 1 |
| S 21 | 1 |
| S 22 | 1 |
| S 23 | 1 |
| S 24 | 1 |
| S 25 | 1 |
| S 26 | 1 |
| S 27 | 1 |

**Table S2.** Fingerprint clustering method classes

| <b>Class ID</b>                                                                                                                                  | <b>Class Size</b>                 |
|--------------------------------------------------------------------------------------------------------------------------------------------------|-----------------------------------|
| Class identifier. ID values of non-singleton classes generally have the form "C 1", "C 2", etc., while singleton classes have "S 1", "S 2", etc. | Number of compounds in the class. |
| C 1                                                                                                                                              | 47                                |
| C 2                                                                                                                                              | 21                                |
| C 3                                                                                                                                              | 21                                |
| C 4                                                                                                                                              | 17                                |
| C 5                                                                                                                                              | 9                                 |
| C 6                                                                                                                                              | 8                                 |
| C 7                                                                                                                                              | 7                                 |
| C 8                                                                                                                                              | 7                                 |
| C 9                                                                                                                                              | 6                                 |
| C 10                                                                                                                                             | 6                                 |
| C 11                                                                                                                                             | 6                                 |
| C 12                                                                                                                                             | 5                                 |
| C 13                                                                                                                                             | 5                                 |
| C 14                                                                                                                                             | 5                                 |
| C 15                                                                                                                                             | 5                                 |
| C 16                                                                                                                                             | 5                                 |
| C 17                                                                                                                                             | 4                                 |
| C 18                                                                                                                                             | 4                                 |
| C 19                                                                                                                                             | 4                                 |
| C 20                                                                                                                                             | 4                                 |
| C 21                                                                                                                                             | 3                                 |
| C 22                                                                                                                                             | 3                                 |
| C 23                                                                                                                                             | 3                                 |
| C 24                                                                                                                                             | 3                                 |
| C 25                                                                                                                                             | 3                                 |
| C 26                                                                                                                                             | 3                                 |
| C 27                                                                                                                                             | 2                                 |
| C 28                                                                                                                                             | 2                                 |
| C 29                                                                                                                                             | 2                                 |
| C 30                                                                                                                                             | 2                                 |
| C 31                                                                                                                                             | 2                                 |
| C 32                                                                                                                                             | 2                                 |
| C 33                                                                                                                                             | 2                                 |
| C 34                                                                                                                                             | 2                                 |
| S 1                                                                                                                                              | 1                                 |
| S 2                                                                                                                                              | 1                                 |
| S 3                                                                                                                                              | 1                                 |
| S 4                                                                                                                                              | 1                                 |
| S 5                                                                                                                                              | 1                                 |
| S 6                                                                                                                                              | 1                                 |
| S 7                                                                                                                                              | 1                                 |
| S 8                                                                                                                                              | 1                                 |
| S 9                                                                                                                                              | 1                                 |
| S 10                                                                                                                                             | 1                                 |
| S 11                                                                                                                                             | 1                                 |
| S 12                                                                                                                                             | 1                                 |
| S 13                                                                                                                                             | 1                                 |

|      |   |
|------|---|
| S 14 | 1 |
| S 15 | 1 |
| S 16 | 1 |
| S 17 | 1 |
| S 18 | 1 |
| S 19 | 1 |
| S 20 | 1 |
| S 21 | 1 |
| S 22 | 1 |
| S 23 | 1 |
| S 24 | 1 |
| S 25 | 1 |
| S 26 | 1 |
| S 27 | 1 |
| S 28 | 1 |
| S 29 | 1 |
| S 30 | 1 |
| S 31 | 1 |
| S 32 | 1 |
| S 33 | 1 |
| S 34 | 1 |
| S 35 | 1 |
| S 36 | 1 |
| S 37 | 1 |
| S 38 | 1 |
| S 39 | 1 |
| S 40 | 1 |
| S 41 | 1 |

**Table S3.** Error metrics for the IV route classified by the protein binding category

| SIMID                   | Protein binding category | RMSE     | R2_LIN | R2_LOG | SPEAR_LIN | SPEAR_LOG | RMSLE    | afe   | aafe | CCC_LOG | CCC_lin | two_fold | three_fold | ten_fold | n   | PARAMETER |
|-------------------------|--------------------------|----------|--------|--------|-----------|-----------|----------|-------|------|---------|---------|----------|------------|----------|-----|-----------|
| 1) Direct Scaling Heps  | High                     | 20200    | 0.0966 | 0.392  | 0.584     | 0.584     | 20200    | 0.25  | 4.21 | 0.352   | 0.0519  | 24       | 42         | 86       | 50  | AUC       |
| 1) Direct Scaling Heps  | Moderate                 | 3390     | 0.219  | 0.499  | 0.677     | 0.677     | 3390     | 0.805 | 1.86 | 0.686   | 0.373   | 62       | 80.9       | 99.2     | 382 | AUC       |
| 2) Dilution Method Heps | High                     | 19800    | 0.106  | 0.35   | 0.556     | 0.556     | 19800    | 1.31  | 2.53 | 0.578   | 0.312   | 44       | 60         | 98       | 50  | AUC       |
| 2) Dilution Method Heps | Moderate                 | 5450     | 0.454  | 0.491  | 0.66      | 0.66      | 5450     | 2.31  | 2.54 | 0.525   | 0.516   | 41.1     | 63.6       | 95.8     | 382 | AUC       |
| 3) Unbound Heps         | High                     | 3.99E+05 | 0.404  | 0.573  | 0.713     | 0.713     | 3.99E+05 | 15.8  | 15.8 | 0.227   | 0.0551  | 4        | 4          | 28       | 50  | AUC       |
| 3) Unbound Heps         | Moderate                 | 17300    | 0.43   | 0.374  | 0.542     | 0.542     | 17300    | 4.02  | 4.12 | 0.331   | 0.222   | 25.4     | 42.9       | 85.6     | 382 | AUC       |
| 4) Back Calculated      | High                     | 2130     | 0.988  | 0.969  | 0.974     | 0.974     | 2130     | 1.01  | 1.15 | 0.984   | 0.994   | 100      | 100        | 100      | 50  | AUC       |
| 4) Back Calculated      | Moderate                 | 1110     | 0.916  | 0.971  | 0.982     | 0.982     | 1110     | 0.998 | 1.13 | 0.984   | 0.951   | 98.7     | 100        | 100      | 382 | AUC       |
| 5) Machine Learning     | High                     | 1.8E+04  | 0.131  | 0.27   | 0.465     | 0.465     | 1.8E+04  | 1.3   | 2.47 | 0.463   | 0.265   | 46       | 70         | 96       | 50  | AUC       |
| 5) Machine Learning     | Moderate                 | 5E+03    | 0.144  | 0.295  | 0.476     | 0.476     | 5E+03    | 2.24  | 2.8  | 0.394   | 0.334   | 34.8     | 59.4       | 94       | 382 | AUC       |
| 6) Austin Method Heps   | High                     | 3.26E+05 | 0.356  | 0.577  | 0.713     | 0.713     | 3.26E+05 | 8.85  | 9.17 | 0.323   | 0.0642  | 4        | 12         | 50       | 50  | AUC       |
| 6) Austin Method Heps   | Moderate                 | 10900    | 0.462  | 0.435  | 0.599     | 0.599     | 10900    | 2.92  | 3.06 | 0.436   | 0.335   | 37.2     | 56.3       | 91.6     | 382 | AUC       |

|                         |          |      |        |        |       |       |      |        |      |        |        |      |      |      |     |     |
|-------------------------|----------|------|--------|--------|-------|-------|------|--------|------|--------|--------|------|------|------|-----|-----|
| 1) Direct Scaling Heps  | High     | 23.6 | 0.137  | 0.221  | 0.424 | 0.424 | 23.6 | 3.99   | 4.19 | 0.21   | 0.153  | 24   | 42   | 86   | 50  | CL  |
| 1) Direct Scaling Heps  | Moderate | 16.4 | 0.223  | 0.27   | 0.521 | 0.521 | 16.4 | 1.24   | 1.86 | 0.475  | 0.448  | 62   | 80.9 | 99.2 | 382 | CL  |
| 2) Dilution Method Heps | High     | 9.82 | 0.0536 | 0.208  | 0.422 | 0.422 | 9.82 | 0.76   | 2.5  | 0.441  | 0.212  | 44   | 60   | 98   | 50  | CL  |
| 2) Dilution Method Heps | Moderate | 21.1 | 0.193  | 0.318  | 0.532 | 0.532 | 21.1 | 0.434  | 2.53 | 0.378  | 0.211  | 41.4 | 63.4 | 95.8 | 382 | CL  |
| 3) Unbound Heps         | High     | 12   | 0.0454 | 0.47   | 0.641 | 0.641 | 12   | 0.0633 | 15.8 | 0.169  | 0.0197 | 4    | 4    | 28   | 50  | CL  |
| 3) Unbound Heps         | Moderate | 23.8 | 0.143  | 0.245  | 0.446 | 0.446 | 23.8 | 0.249  | 4.12 | 0.233  | 0.136  | 24.9 | 43.5 | 85.3 | 382 | CL  |
| 4) Back Calculated      | High     | 1.89 | 0.956  | 0.959  | 0.969 | 0.969 | 1.89 | 0.987  | 1.15 | 0.979  | 0.975  | 100  | 100  | 100  | 50  | CL  |
| 4) Back Calculated      | Moderate | 4.05 | 0.948  | 0.958  | 0.978 | 0.978 | 4.05 | 1      | 1.13 | 0.978  | 0.973  | 98.7 | 100  | 100  | 382 | CL  |
| 5) Machine Learning     | High     | 9.38 | 0.0655 | 0.0749 | 0.361 | 0.361 | 9.38 | 0.767  | 2.48 | 0.21   | 0.12   | 42   | 70   | 96   | 50  | CL  |
| 5) Machine Learning     | Moderate | 23.4 | 0.0144 | 0.0298 | 0.14  | 0.14  | 23.4 | 0.447  | 2.8  | 0.0904 | 0.0305 | 35.1 | 58.9 | 94   | 382 | CL  |
| 6) Austin Method Heps   | High     | 11.6 | 0.0343 | 0.466  | 0.626 | 0.626 | 11.6 | 0.113  | 9.19 | 0.244  | 0.0355 | 4    | 12   | 50   | 50  | CL  |
| 6) Austin Method Heps   | Moderate | 22.1 | 0.177  | 0.295  | 0.507 | 0.507 | 22.1 | 0.343  | 3.06 | 0.321  | 0.189  | 37.2 | 56   | 91.6 | 382 | CL  |
| 1) Direct Scaling Heps  | High     | 2.3  | 0.0385 | 0.0967 | 0.29  | 0.29  | 2.3  | 0.85   | 2.31 | 0.297  | 0.176  | 61.2 | 73.5 | 89.8 | 49  | VSS |
| 1) Direct Scaling Heps  | Moderate | 2.84 | 0.475  | 0.441  | 0.648 | 0.648 | 2.84 | 0.674  | 1.97 | 0.6    | 0.645  | 58.8 | 82.6 | 98.1 | 374 | VSS |

|                         |          |      |         |        |       |       |      |       |      |       |        |      |      |      |     |     |
|-------------------------|----------|------|---------|--------|-------|-------|------|-------|------|-------|--------|------|------|------|-----|-----|
| 2) Dilution Method Heps | High     | 2.37 | 0.0367  | 0.0969 | 0.296 | 0.296 | 2.37 | 0.866 | 2.32 | 0.297 | 0.168  | 59.2 | 73.5 | 89.8 | 49  | VSS |
| 2) Dilution Method Heps | Moderate | 2.84 | 0.475   | 0.441  | 0.648 | 0.648 | 2.84 | 0.683 | 1.97 | 0.603 | 0.65   | 60.2 | 83.2 | 98.1 | 374 | VSS |
| 3) Unbound Heps         | High     | 2.4  | 0.0356  | 0.0962 | 0.292 | 0.292 | 2.4  | 0.872 | 2.32 | 0.296 | 0.164  | 61.2 | 73.5 | 89.8 | 49  | VSS |
| 3) Unbound Heps         | Moderate | 2.84 | 0.474   | 0.441  | 0.648 | 0.648 | 2.84 | 0.685 | 1.96 | 0.604 | 0.651  | 60.7 | 83.4 | 98.1 | 374 | VSS |
| 4) Back Calculated      | High     | 2.37 | 0.0348  | 0.0941 | 0.293 | 0.293 | 2.37 | 0.865 | 2.32 | 0.293 | 0.164  | 61.2 | 73.5 | 89.8 | 49  | VSS |
| 4) Back Calculated      | Moderate | 2.9  | 0.453   | 0.434  | 0.643 | 0.643 | 2.9  | 0.674 | 1.98 | 0.595 | 0.626  | 59.6 | 82.4 | 97.9 | 374 | VSS |
| 5) Machine Learning     | High     | 4.61 | 0.00851 | 0.0175 | 0.303 | 0.303 | 4.61 | 3.09  | 4.54 | 0.077 | 0.0362 | 16.3 | 32.7 | 81.6 | 49  | VSS |
| 5) Machine Learning     | Moderate | 3.08 | 0.376   | 0.279  | 0.566 | 0.566 | 3.08 | 0.877 | 2.26 | 0.501 | 0.598  | 49.2 | 75.4 | 96.3 | 374 | VSS |
| 6) Austin Method Heps   | High     | 2.4  | 0.0357  | 0.0963 | 0.292 | 0.292 | 2.4  | 0.871 | 2.32 | 0.296 | 0.165  | 61.2 | 73.5 | 89.8 | 49  | VSS |
| 6) Austin Method Heps   | Moderate | 2.83 | 0.475   | 0.442  | 0.648 | 0.648 | 2.83 | 0.684 | 1.96 | 0.603 | 0.65   | 60.4 | 83.2 | 98.1 | 374 | VSS |

**Table S4.** Error metrics for the IV route classified by the clearance category

| SIMID                   | CL_CATEGORY | RMSE     | R2_LIN   | R2_LOG   | SPEAR_LIN | SPEAR_LOG | RMSLE    | afe   | aafe | CCC_LOG | CCC_lin | two_fold | three_fold | ten_fold | n   | PARAMETER |
|-------------------------|-------------|----------|----------|----------|-----------|-----------|----------|-------|------|---------|---------|----------|------------|----------|-----|-----------|
| 1) Direct Scaling Heps  | High        | 661      | 0.445    | 0.52     | 0.701     | 0.701     | 661      | 1.69  | 1.72 | 0.542   | 0.459   | 67.3     | 85.7       | 100      | 49  | AUC       |
| 1) Direct Scaling Heps  | Moderate    | 1900     | 0.369    | 0.669    | 0.821     | 0.821     | 1900     | 1.08  | 1.47 | 0.813   | 0.525   | 82.5     | 91.2       | 100      | 160 | AUC       |
| 1) Direct Scaling Heps  | Low         | 1890     | 0.197    | 0.397    | 0.575     | 0.575     | 1890     | 0.558 | 2.19 | 0.49    | 0.387   | 48.3     | 74.1       | 99.3     | 143 | AUC       |
| 1) Direct Scaling Heps  | Very Low    | 17200    | 0.0943   | 0.584    | 0.697     | 0.697     | 17200    | 0.262 | 3.89 | 0.481   | 0.0642  | 18.8     | 45         | 88.8     | 80  | AUC       |
| 2) Dilution Method Heps | High        | 3530     | 0.0373   | 0.17     | 0.402     | 0.402     | 3530     | 4.42  | 4.42 | 0.131   | 0.032   | 14.3     | 32.7       | 81.6     | 49  | AUC       |
| 2) Dilution Method Heps | Moderate    | 5610     | 0.341    | 0.523    | 0.707     | 0.707     | 5610     | 2.88  | 2.94 | 0.426   | 0.214   | 31.9     | 55         | 95.6     | 160 | AUC       |
| 2) Dilution Method Heps | Low         | 3950     | 0.198    | 0.328    | 0.542     | 0.542     | 3950     | 1.77  | 2.05 | 0.448   | 0.263   | 53.1     | 72         | 100      | 143 | AUC       |
| 2) Dilution Method Heps | Very Low    | 1.7E+04  | 0.132    | 0.609    | 0.748     | 0.748     | 1.7E+04  | 1.12  | 1.95 | 0.774   | 0.357   | 56.2     | 82.5       | 98.8     | 80  | AUC       |
| 3) Unbound Heps         | High        | 10800    | 0.00491  | 0.0736   | 0.295     | 0.295     | 10800    | 7.97  | 7.97 | 0.0627  | 0.00435 | 6.12     | 18.4       | 63.3     | 49  | AUC       |
| 3) Unbound Heps         | Moderate    | 16500    | 0.149    | 0.335    | 0.533     | 0.533     | 16500    | 5.21  | 5.27 | 0.238   | 0.054   | 16.9     | 32.5       | 80       | 160 | AUC       |
| 3) Unbound Heps         | Low         | 17200    | 0.0111   | 0.148    | 0.407     | 0.407     | 17200    | 3.78  | 3.82 | 0.164   | 0.0176  | 32.2     | 46.9       | 84.6     | 143 | AUC       |
| 3) Unbound Heps         | Very Low    | 3.16E+05 | 0.369    | 0.568    | 0.703     | 0.703     | 3.16E+05 | 4.12  | 4.44 | 0.492   | 0.0564  | 28.7     | 47.5       | 76.2     | 80  | AUC       |
| 4) Back Calculated      | High        | 92.9     | 0.953    | 0.952    | 0.969     | 0.969     | 92.9     | 1.01  | 1.11 | 0.975   | 0.975   | 100      | 100        | 100      | 49  | AUC       |
| 4) Back Calculated      | Moderate    | 538      | 0.857    | 0.97     | 0.985     | 0.985     | 538      | 1.01  | 1.1  | 0.984   | 0.912   | 99.4     | 100        | 100      | 160 | AUC       |
| 4) Back Calculated      | Low         | 563      | 0.893    | 0.907    | 0.914     | 0.914     | 563      | 1     | 1.17 | 0.949   | 0.945   | 97.9     | 100        | 100      | 143 | AUC       |
| 4) Back Calculated      | Very Low    | 2760     | 0.971    | 0.969    | 0.977     | 0.977     | 2760     | 0.964 | 1.16 | 0.984   | 0.984   | 98.8     | 100        | 100      | 80  | AUC       |
| 5) Machine Learning     | High        | 4960     | 0.345    | 0.388    | 0.597     | 0.597     | 4960     | 6.55  | 6.55 | 0.116   | 0.0674  | 0        | 8.16       | 73.5     | 49  | AUC       |
| 5) Machine Learning     | Moderate    | 5480     | 0.473    | 0.582    | 0.736     | 0.736     | 5480     | 3.46  | 3.5  | 0.379   | 0.235   | 15.6     | 40.6       | 93.8     | 160 | AUC       |
| 5) Machine Learning     | Low         | 2820     | 0.294    | 0.41     | 0.55      | 0.55      | 2820     | 1.57  | 1.85 | 0.535   | 0.404   | 62.2     | 89.5       | 100      | 143 | AUC       |
| 5) Machine Learning     | Very Low    | 15300    | 0.153    | 0.604    | 0.678     | 0.678     | 15300    | 0.648 | 2.06 | 0.724   | 0.306   | 52.5     | 81.2       | 97.5     | 80  | AUC       |
| 6) Austin Method Heps   | High        | 6540     | 0.00794  | 0.103    | 0.355     | 0.355     | 6540     | 5.62  | 5.62 | 0.0923  | 0.00891 | 14.3     | 28.6       | 77.6     | 49  | AUC       |
| 6) Austin Method Heps   | Moderate    | 10200    | 0.202    | 0.412    | 0.611     | 0.611     | 10200    | 3.77  | 3.83 | 0.324   | 0.0989  | 25       | 46.9       | 85.6     | 160 | AUC       |
| 6) Austin Method Heps   | Low         | 8270     | 0.0468   | 0.203    | 0.432     | 0.432     | 8270     | 2.63  | 2.74 | 0.258   | 0.069   | 46.9     | 62.2       | 91.6     | 143 | AUC       |
| 6) Austin Method Heps   | Very Low    | 2.58E+05 | 0.324    | 0.625    | 0.735     | 0.735     | 2.58E+05 | 2.8   | 3.29 | 0.603   | 0.065   | 37.5     | 53.8       | 86.2     | 80  | AUC       |
| 1) Direct Scaling Heps  | High        | 27.2     | 3.32E-05 | 2.32E-04 | 0.103     | 0.103     | 27.2     | 0.593 | 1.72 | 0.00588 | 0.00247 | 67.3     | 85.7       | 100      | 49  | CL        |
| 1) Direct Scaling Heps  | Moderate    | 12.4     | 0.144    | 0.184    | 0.397     | 0.397     | 12.4     | 0.923 | 1.48 | 0.382   | 0.378   | 83.1     | 91.2       | 100      | 160 | CL        |
| 1) Direct Scaling Heps  | Low         | 17.9     | 0.00877  | 0.0018   | 0.0936    | 0.0936    | 17.9     | 1.79  | 2.18 | 0.0238  | 0.0388  | 47.6     | 74.1       | 99.3     | 143 | CL        |

|                         |          |       |         |         |         |         |       |       |      |          |          |      |      |      |     |     |
|-------------------------|----------|-------|---------|---------|---------|---------|-------|-------|------|----------|----------|------|------|------|-----|-----|
| 1) Direct Scaling Heps  | Very Low | 17.1  | 0.0581  | 0.0556  | 0.25    | 0.25    | 17.1  | 3.82  | 3.89 | 0.0811   | 0.0387   | 18.8 | 45   | 88.8 | 80  | CL  |
| 2) Dilution Method Heps | High     | 43.2  | 0.0188  | 0.0138  | -0.081  | -0.081  | 43.2  | 0.227 | 4.41 | -0.0143  | -0.0174  | 14.3 | 32.7 | 83.7 | 49  | CL  |
| 2) Dilution Method Heps | Moderate | 21.3  | 0.0682  | 0.126   | 0.329   | 0.329   | 21.3  | 0.347 | 2.94 | 0.104    | 0.0913   | 31.9 | 54.4 | 95   | 160 | CL  |
| 2) Dilution Method Heps | Low      | 8.11  | 0.0315  | 0.0337  | 0.193   | 0.193   | 8.11  | 0.565 | 2.05 | 0.106    | 0.13     | 53.8 | 72   | 100  | 143 | CL  |
| 2) Dilution Method Heps | Very Low | 4.74  | 0.0763  | 0.172   | 0.479   | 0.479   | 4.74  | 0.891 | 1.95 | 0.398    | 0.195    | 56.2 | 82.5 | 98.8 | 80  | CL  |
| 3) Unbound Heps         | High     | 47.8  | 0.0263  | 0.0144  | -0.146  | -0.146  | 47.8  | 0.126 | 7.94 | -0.0104  | -0.016   | 6.12 | 20.4 | 63.3 | 49  | CL  |
| 3) Unbound Heps         | Moderate | 24.7  | 0.0505  | 0.0693  | 0.299   | 0.299   | 24.7  | 0.192 | 5.27 | 0.049    | 0.0593   | 16.2 | 32.5 | 79.4 | 160 | CL  |
| 3) Unbound Heps         | Low      | 9.95  | 0.0571  | 0.051   | 0.24    | 0.24    | 9.95  | 0.264 | 3.83 | 0.0609   | 0.0703   | 30.8 | 47.6 | 84.6 | 143 | CL  |
| 3) Unbound Heps         | Very Low | 3.11  | 0.209   | 0.371   | 0.546   | 0.546   | 3.11  | 0.243 | 4.43 | 0.262    | 0.294    | 30   | 47.5 | 76.2 | 80  | CL  |
| 4) Back Calculated      | High     | 7.85  | 0.637   | 0.643   | 0.793   | 0.793   | 7.85  | 0.997 | 1.1  | 0.792    | 0.782    | 100  | 100  | 100  | 49  | CL  |
| 4) Back Calculated      | Moderate | 3.91  | 0.871   | 0.841   | 0.919   | 0.919   | 3.91  | 0.988 | 1.1  | 0.916    | 0.931    | 99.4 | 100  | 100  | 160 | CL  |
| 4) Back Calculated      | Low      | 2.51  | 0.78    | 0.705   | 0.837   | 0.837   | 2.51  | 0.994 | 1.17 | 0.833    | 0.877    | 97.9 | 100  | 100  | 143 | CL  |
| 4) Back Calculated      | Very Low | 0.877 | 0.819   | 0.9     | 0.909   | 0.909   | 0.877 | 1.04  | 1.16 | 0.947    | 0.903    | 98.8 | 100  | 100  | 80  | CL  |
| 5) Machine Learning     | High     | 48.1  | 0.0332  | 0.0329  | -0.0821 | -0.0821 | 48.1  | 0.153 | 6.52 | -0.0101  | -0.00858 | 0    | 8.16 | 73.5 | 49  | CL  |
| 5) Machine Learning     | Moderate | 23.9  | 0.00439 | 0.002   | 0.11    | 0.11    | 23.9  | 0.289 | 3.5  | 0.00837  | 0.0117   | 15.6 | 39.4 | 93.8 | 160 | CL  |
| 5) Machine Learning     | Low      | 7.49  | 0.00798 | 0.0111  | 0.0806  | 0.0806  | 7.49  | 0.635 | 1.85 | 0.0689   | 0.054    | 62.2 | 89.5 | 100  | 143 | CL  |
| 5) Machine Learning     | Very Low | 3.96  | 0.0567  | 0.0563  | 0.264   | 0.264   | 3.96  | 1.54  | 2.07 | 0.192    | 0.165    | 51.2 | 81.2 | 97.5 | 80  | CL  |
| 6) Austin Method Heps   | High     | 45    | 0.0178  | 0.00436 | -0.084  | -0.084  | 45    | 0.179 | 5.6  | -0.00731 | -0.0164  | 12.2 | 28.6 | 77.6 | 49  | CL  |
| 6) Austin Method Heps   | Moderate | 22.8  | 0.0706  | 0.114   | 0.339   | 0.339   | 22.8  | 0.265 | 3.83 | 0.0808   | 0.088    | 25.6 | 46.2 | 85.6 | 160 | CL  |
| 6) Austin Method Heps   | Low      | 8.75  | 0.0887  | 0.0729  | 0.311   | 0.31    | 8.75  | 0.38  | 2.74 | 0.102    | 0.147    | 46.9 | 62.2 | 91.6 | 143 | CL  |
| 6) Austin Method Heps   | Very Low | 3.48  | 0.163   | 0.408   | 0.565   | 0.565   | 3.48  | 0.357 | 3.29 | 0.35     | 0.314    | 37.5 | 53.8 | 86.2 | 80  | CL  |
| 1) Direct Scaling Heps  | High     | 4.72  | 0.692   | 0.545   | 0.676   | 0.676   | 4.72  | 0.442 | 2.46 | 0.545    | 0.571    | 42.9 | 75.5 | 95.9 | 49  | VSS |
| 1) Direct Scaling Heps  | Moderate | 2.74  | 0.612   | 0.454   | 0.634   | 0.634   | 2.74  | 0.563 | 2.06 | 0.545    | 0.683    | 56.6 | 79.9 | 96.9 | 159 | VSS |
| 1) Direct Scaling Heps  | Low      | 2.13  | 0.506   | 0.424   | 0.645   | 0.645   | 2.13  | 0.843 | 1.91 | 0.612    | 0.68     | 63.8 | 83.3 | 98.6 | 138 | VSS |
| 1) Direct Scaling Heps  | Very Low | 2.19  | 0.0765  | 0.3     | 0.547   | 0.547   | 2.19  | 0.991 | 1.84 | 0.529    | 0.213    | 66.2 | 85.7 | 96.1 | 77  | VSS |
| 2) Dilution Method Heps | High     | 4.68  | 0.685   | 0.543   | 0.675   | 0.675   | 4.68  | 0.45  | 2.43 | 0.55     | 0.579    | 42.9 | 77.6 | 95.9 | 49  | VSS |
| 2) Dilution Method Heps | Moderate | 2.71  | 0.61    | 0.453   | 0.636   | 0.636   | 2.71  | 0.571 | 2.05 | 0.549    | 0.692    | 58.5 | 80.5 | 96.9 | 159 | VSS |
| 2) Dilution Method Heps | Low      | 2.18  | 0.501   | 0.422   | 0.642   | 0.642   | 2.18  | 0.855 | 1.91 | 0.612    | 0.673    | 63.8 | 83.3 | 98.6 | 138 | VSS |
| 2) Dilution Method Heps | Very Low | 2.24  | 0.0726  | 0.296   | 0.547   | 0.547   | 2.24  | 1     | 1.85 | 0.524    | 0.204    | 67.5 | 85.7 | 96.1 | 77  | VSS |
| 3) Unbound Heps         | High     | 4.67  | 0.683   | 0.542   | 0.675   | 0.675   | 4.67  | 0.452 | 2.42 | 0.551    | 0.581    | 46.9 | 77.6 | 95.9 | 49  | VSS |
| 3) Unbound Heps         | Moderate | 2.71  | 0.61    | 0.453   | 0.636   | 0.636   | 2.71  | 0.573 | 2.04 | 0.55     | 0.693    | 58.5 | 81.1 | 96.9 | 159 | VSS |



|                       |          |      |        |        |       |       |      |       |      |       |        |      |      |      |     |     |
|-----------------------|----------|------|--------|--------|-------|-------|------|-------|------|-------|--------|------|------|------|-----|-----|
| 3) Unbound Heps       | Low      | 2.19 | 0.499  | 0.421  | 0.641 | 0.641 | 2.19 | 0.858 | 1.91 | 0.612 | 0.671  | 64.5 | 83.3 | 98.6 | 138 | VSS |
| 3) Unbound Heps       | Very Low | 2.26 | 0.0712 | 0.294  | 0.545 | 0.545 | 2.26 | 1     | 1.85 | 0.523 | 0.201  | 67.5 | 85.7 | 96.1 | 77  | VSS |
| 4) Back Calculated    | High     | 4.9  | 0.677  | 0.536  | 0.675 | 0.675 | 4.9  | 0.432 | 2.5  | 0.533 | 0.534  | 42.9 | 75.5 | 95.9 | 49  | VSS |
| 4) Back Calculated    | Moderate | 2.76 | 0.607  | 0.45   | 0.634 | 0.634 | 2.76 | 0.562 | 2.06 | 0.543 | 0.673  | 57.9 | 79.9 | 96.2 | 159 | VSS |
| 4) Back Calculated    | Low      | 2.16 | 0.497  | 0.419  | 0.642 | 0.642 | 2.16 | 0.851 | 1.91 | 0.61  | 0.674  | 63.8 | 82.6 | 98.6 | 138 | VSS |
| 4) Back Calculated    | Very Low | 2.25 | 0.0705 | 0.294  | 0.547 | 0.547 | 2.25 | 1     | 1.85 | 0.522 | 0.201  | 67.5 | 85.7 | 96.1 | 77  | VSS |
| 5) Machine Learning   | High     | 4.75 | 0.54   | 0.38   | 0.641 | 0.641 | 4.75 | 0.542 | 2.36 | 0.508 | 0.547  | 51   | 73.5 | 95.9 | 49  | VSS |
| 5) Machine Learning   | Moderate | 2.89 | 0.475  | 0.351  | 0.63  | 0.63  | 2.89 | 0.683 | 2.27 | 0.504 | 0.661  | 50.3 | 76.1 | 94.3 | 159 | VSS |
| 5) Machine Learning   | Low      | 2.77 | 0.398  | 0.241  | 0.557 | 0.557 | 2.77 | 1.31  | 2.37 | 0.452 | 0.538  | 44.2 | 70.3 | 97.1 | 138 | VSS |
| 5) Machine Learning   | Very Low | 3.78 | 0.0242 | 0.0638 | 0.203 | 0.203 | 3.78 | 2.16  | 3.09 | 0.178 | 0.0672 | 33.8 | 57.1 | 89.6 | 77  | VSS |
| 6) Austin Method Heps | High     | 4.68 | 0.685  | 0.543  | 0.675 | 0.675 | 4.68 | 0.451 | 2.43 | 0.55  | 0.579  | 44.9 | 77.6 | 95.9 | 49  | VSS |
| 6) Austin Method Heps | Moderate | 2.71 | 0.61   | 0.453  | 0.637 | 0.637 | 2.71 | 0.572 | 2.05 | 0.55  | 0.692  | 58.5 | 80.5 | 96.9 | 159 | VSS |
| 6) Austin Method Heps | Low      | 2.19 | 0.498  | 0.421  | 0.641 | 0.641 | 2.19 | 0.857 | 1.91 | 0.612 | 0.671  | 64.5 | 83.3 | 98.6 | 138 | VSS |
| 6) Austin Method Heps | Very Low | 2.25 | 0.0723 | 0.295  | 0.545 | 0.545 | 2.25 | 1     | 1.85 | 0.523 | 0.203  | 67.5 | 85.7 | 96.1 | 77  | VSS |

**Table S5.** Full error metrics for the IV route

| SIMID                   | RMSE     | R2_LIN | R2_LOG | SPEAR_LIN | SPEAR_LOG | RMSLE    | afe   | aafe | CCC_LOG | CCC_lin | two_fold | three_fold | ten_fold | n   | PARAMETER |
|-------------------------|----------|--------|--------|-----------|-----------|----------|-------|------|---------|---------|----------|------------|----------|-----|-----------|
| 1) Direct Scaling Heps  | 7580     | 0.0782 | 0.419  | 0.622     | 0.622     | 7580     | 0.703 | 2.05 | 0.603   | 0.128   | 57.6     | 76.4       | 97.7     | 432 | AUC       |
| 2) Dilution Method Heps | 8470     | 0.216  | 0.471  | 0.638     | 0.638     | 8470     | 2.16  | 2.53 | 0.545   | 0.44    | 41.4     | 63.2       | 96.1     | 432 | AUC       |
| 3) Unbound Heps         | 1.37E+05 | 0.401  | 0.436  | 0.564     | 0.564     | 1.37E+05 | 4.71  | 4.81 | 0.364   | 0.0679  | 22.9     | 38.4       | 78.9     | 432 | AUC       |
| 4) Back Calculated      | 1270     | 0.974  | 0.972  | 0.982     | 0.982     | 1270     | 1     | 1.14 | 0.986   | 0.986   | 98.8     | 100        | 100      | 432 | AUC       |
| 5) Machine Learning     | 7720     | 0.129  | 0.308  | 0.489     | 0.489     | 7720     | 2.1   | 2.76 | 0.422   | 0.323   | 36.1     | 60.6       | 94.2     | 432 | AUC       |
| 6) Austin Method Heps   | 1.12E+05 | 0.353  | 0.489  | 0.611     | 0.611     | 1.12E+05 | 3.31  | 3.48 | 0.464   | 0.0779  | 33.3     | 51.2       | 86.8     | 432 | AUC       |
| 1) Direct Scaling Heps  | 17.4     | 0.179  | 0.222  | 0.471     | 0.471     | 17.4     | 1.42  | 2.05 | 0.398   | 0.397   | 57.6     | 76.4       | 97.7     | 432 | CL        |
| 2) Dilution Method Heps | 20.1     | 0.198  | 0.33   | 0.541     | 0.541     | 20.1     | 0.463 | 2.53 | 0.423   | 0.227   | 41.7     | 63         | 96.1     | 432 | CL        |
| 3) Unbound Heps         | 22.8     | 0.181  | 0.379  | 0.528     | 0.528     | 22.8     | 0.212 | 4.81 | 0.309   | 0.159   | 22.5     | 38.9       | 78.7     | 432 | CL        |
| 4) Back Calculated      | 3.86     | 0.952  | 0.964  | 0.98      | 0.98      | 3.86     | 1     | 1.13 | 0.981   | 0.975   | 98.8     | 100        | 100      | 432 | CL        |
| 5) Machine Learning     | 22.2     | 0.0391 | 0.0902 | 0.246     | 0.246     | 22.2     | 0.476 | 2.76 | 0.176   | 0.0546  | 35.9     | 60.2       | 94.2     | 432 | CL        |
| 6) Austin Method Heps   | 21.2     | 0.217  | 0.419  | 0.574     | 0.574     | 21.2     | 0.302 | 3.48 | 0.397   | 0.218   | 33.3     | 50.9       | 86.8     | 432 | CL        |
| 1) Direct Scaling Heps  | 2.78     | 0.449  | 0.401  | 0.603     | 0.603     | 2.78     | 0.692 | 2.01 | 0.582   | 0.634   | 59.1     | 81.6       | 97.2     | 423 | VSS       |
| 2) Dilution Method Heps | 2.79     | 0.447  | 0.4    | 0.602     | 0.602     | 2.79     | 0.702 | 2    | 0.584   | 0.638   | 60       | 82         | 97.2     | 423 | VSS       |
| 3) Unbound Heps         | 2.79     | 0.446  | 0.399  | 0.602     | 0.602     | 2.79     | 0.704 | 2    | 0.584   | 0.638   | 60.8     | 82.3       | 97.2     | 423 | VSS       |
| 4) Back Calculated      | 2.85     | 0.425  | 0.392  | 0.598     | 0.598     | 2.85     | 0.694 | 2.02 | 0.576   | 0.615   | 59.8     | 81.3       | 96.9     | 423 | VSS       |
| 5) Machine Learning     | 3.3      | 0.29   | 0.182  | 0.46      | 0.46      | 3.3      | 1.01  | 2.45 | 0.412   | 0.527   | 45.4     | 70.4       | 94.6     | 423 | VSS       |
| 6) Austin Method Heps   | 2.79     | 0.447  | 0.399  | 0.602     | 0.602     | 2.79     | 0.703 | 2    | 0.584   | 0.637   | 60.5     | 82         | 97.2     | 423 | VSS       |

**Table S6.** Full error metrics for the oral route

| SIMID                            | RMSE     | R2_LIN | R2_LOG | SPEAR_LIN | SPEAR_LOG | RMSLE    | afe   | aafe | CCC_LOG | CCC_lin | two_fold | three_fold | ten_fold | n   | PARAMETER |
|----------------------------------|----------|--------|--------|-----------|-----------|----------|-------|------|---------|---------|----------|------------|----------|-----|-----------|
| 1) Direct Scaling Heps           | 41800    | 0.0755 | 0.367  | 0.6       | 0.6       | 41800    | 0.589 | 3.29 | 0.559   | 0.11    | 38       | 56.8       | 86.2     | 479 | AUC       |
| 2) Dilution Method Heps          | 37600    | 0.254  | 0.473  | 0.673     | 0.673     | 37600    | 2.62  | 3.57 | 0.55    | 0.475   | 31.9     | 50.4       | 87.5     | 480 | AUC       |
| 3) Austin Method Heps            | 3.54E+05 | 0.229  | 0.477  | 0.662     | 0.662     | 3.54E+05 | 4.13  | 4.8  | 0.502   | 0.105   | 23.3     | 40.8       | 78.8     | 480 | AUC       |
| 4) Back Calculated CL + in vitro | 33700    | 0.384  | 0.654  | 0.855     | 0.855     | 33700    | 0.79  | 2.12 | 0.801   | 0.511   | 59.4     | 80         | 96.2     | 480 | AUC       |

|                                     |       |         |        |       |       |       |       |      |        |        |      |      |      |     |       |
|-------------------------------------|-------|---------|--------|-------|-------|-------|-------|------|--------|--------|------|------|------|-----|-------|
| 5) ML Physchem + Back Calculated CL | 30500 | 0.497   | 0.682  | 0.858 | 0.858 | 30500 | 0.905 | 2.01 | 0.825  | 0.688  | 63.5 | 81.9 | 96.2 | 480 | AUC   |
| 6) ML All properties                | 31100 | 0.475   | 0.322  | 0.512 | 0.512 | 31100 | 2.9   | 4.2  | 0.417  | 0.668  | 27.9 | 45.4 | 81.7 | 480 | AUC   |
| 7) HT-PBPK                          | 31900 | 0.456   | 0.686  | 0.869 | 0.869 | 31900 | 0.752 | 2.05 | 0.818  | 0.576  | 63.1 | 80.6 | 96   | 480 | AUC   |
| 1) Direct Scaling Heps              | 3730  | 0.111   | 0.32   | 0.561 | 0.561 | 3730  | 0.884 | 2.97 | 0.563  | 0.315  | 40.5 | 58   | 91   | 479 | CMAX  |
| 2) Dilution Method Heps             | 4970  | 0.206   | 0.395  | 0.618 | 0.618 | 4970  | 2.13  | 3.12 | 0.549  | 0.409  | 38.8 | 59   | 87.1 | 480 | CMAX  |
| 3) Austin Method Heps               | 6420  | 0.273   | 0.408  | 0.622 | 0.622 | 6420  | 2.51  | 3.34 | 0.532  | 0.396  | 36.9 | 54.6 | 85.6 | 480 | CMAX  |
| 4) Back Calculated CL + in vitro    | 3270  | 0.359   | 0.514  | 0.755 | 0.755 | 3270  | 1.03  | 2.46 | 0.713  | 0.599  | 47.5 | 72.5 | 95.4 | 480 | CMAX  |
| 5) ML Physchem + Back Calculated CL | 4470  | 0.447   | 0.555  | 0.758 | 0.758 | 4470  | 1.53  | 2.53 | 0.715  | 0.587  | 48.1 | 66.2 | 94.4 | 480 | CMAX  |
| 6) ML All properties                | 6550  | 0.133   | 0.289  | 0.531 | 0.531 | 6550  | 2.41  | 3.69 | 0.453  | 0.289  | 33.5 | 50.4 | 81.9 | 480 | CMAX  |
| 7) HT-PBPK                          | 4370  | 0.412   | 0.54   | 0.752 | 0.752 | 4370  | 1.35  | 2.45 | 0.716  | 0.577  | 49.4 | 70.8 | 94   | 480 | CMAX  |
| 1) Direct Scaling Heps              | 107   | 0.0227  | 0.0477 | 0.307 | 0.307 | 107   | 0.833 | 1.89 | 0.203  | 0.0607 | 66.3 | 84.9 | 97.3 | 410 | FORAL |
| 2) Dilution Method Heps             | 105   | 0.0161  | 0.0218 | 0.257 | 0.257 | 105   | 1.22  | 1.85 | 0.123  | 0.0515 | 68.6 | 85.4 | 96.8 | 411 | FORAL |
| 3) Austin Method Heps               | 106   | 0.0142  | 0.018  | 0.221 | 0.221 | 106   | 1.26  | 1.88 | 0.109  | 0.0491 | 68.6 | 85.2 | 96.8 | 411 | FORAL |
| 4) Back Calculated CL + in vitro    | 107   | 0.0241  | 0.0547 | 0.309 | 0.309 | 107   | 0.808 | 2.05 | 0.222  | 0.0724 | 64.5 | 83   | 95.9 | 411 | FORAL |
| 5) ML Physchem + Back Calculated CL | 106   | 0.0253  | 0.053  | 0.307 | 0.307 | 106   | 0.928 | 1.95 | 0.227  | 0.0734 | 68.1 | 84.7 | 96.1 | 411 | FORAL |
| 6) ML All properties                | 107   | 0.00425 | 0.0016 | 0.157 | 0.157 | 107   | 1.46  | 1.94 | 0.0238 | 0.0205 | 65.9 | 82.7 | 97.3 | 411 | FORAL |
| 7) HT-PBPK                          | 106   | 0.0226  | 0.0566 | 0.327 | 0.327 | 106   | 0.862 | 1.96 | 0.23   | 0.0687 | 65.9 | 83.5 | 95.9 | 411 | FORAL |
